# Supplementary material
Source: publisher figshare collection journal article supplement (https://acs.figshare.com/ndownloader/files/10071562)

## SUPPORTING INFORMATION FIGURE LEGENDS

**Figure S1.** Mass spectra for DAI-GS. (a) ESI-MS of protonated parent ion ( $m/z$  517) and (b) ESI-MS/MS of protonated fragment ions ( $m/z$  255).

**Figure S2.** Mass spectra for GEN-GS. (a) ESI-MS of protonated parent ion ( $m/z$  533) and (b) ESI-MS/MS of protonated fragment ions ( $m/z$  271).

**Figure S3.** NMR spectra of DAI-4'P. (a)  $^1\text{H}$  (in  $\text{DMSO-}d_6$ , 500 MHz) and (b)  $^{13}\text{C}$  (in  $\text{DMSO-}d_6$ , 125 MHz) NMR spectra of DAI-4'P.

**Figure S4.** NMR spectra of GEN-4'P. (a)  $^1\text{H}$  (in  $\text{DMSO-}d_6$ , 500 MHz) and (b)  $^{13}\text{C}$  (in  $\text{DMSO-}d_6$ , 125 MHz) NMR spectra of GEN-4'P.

Figure S1.

6''-O-succinyl daidzin (DAI-GS)

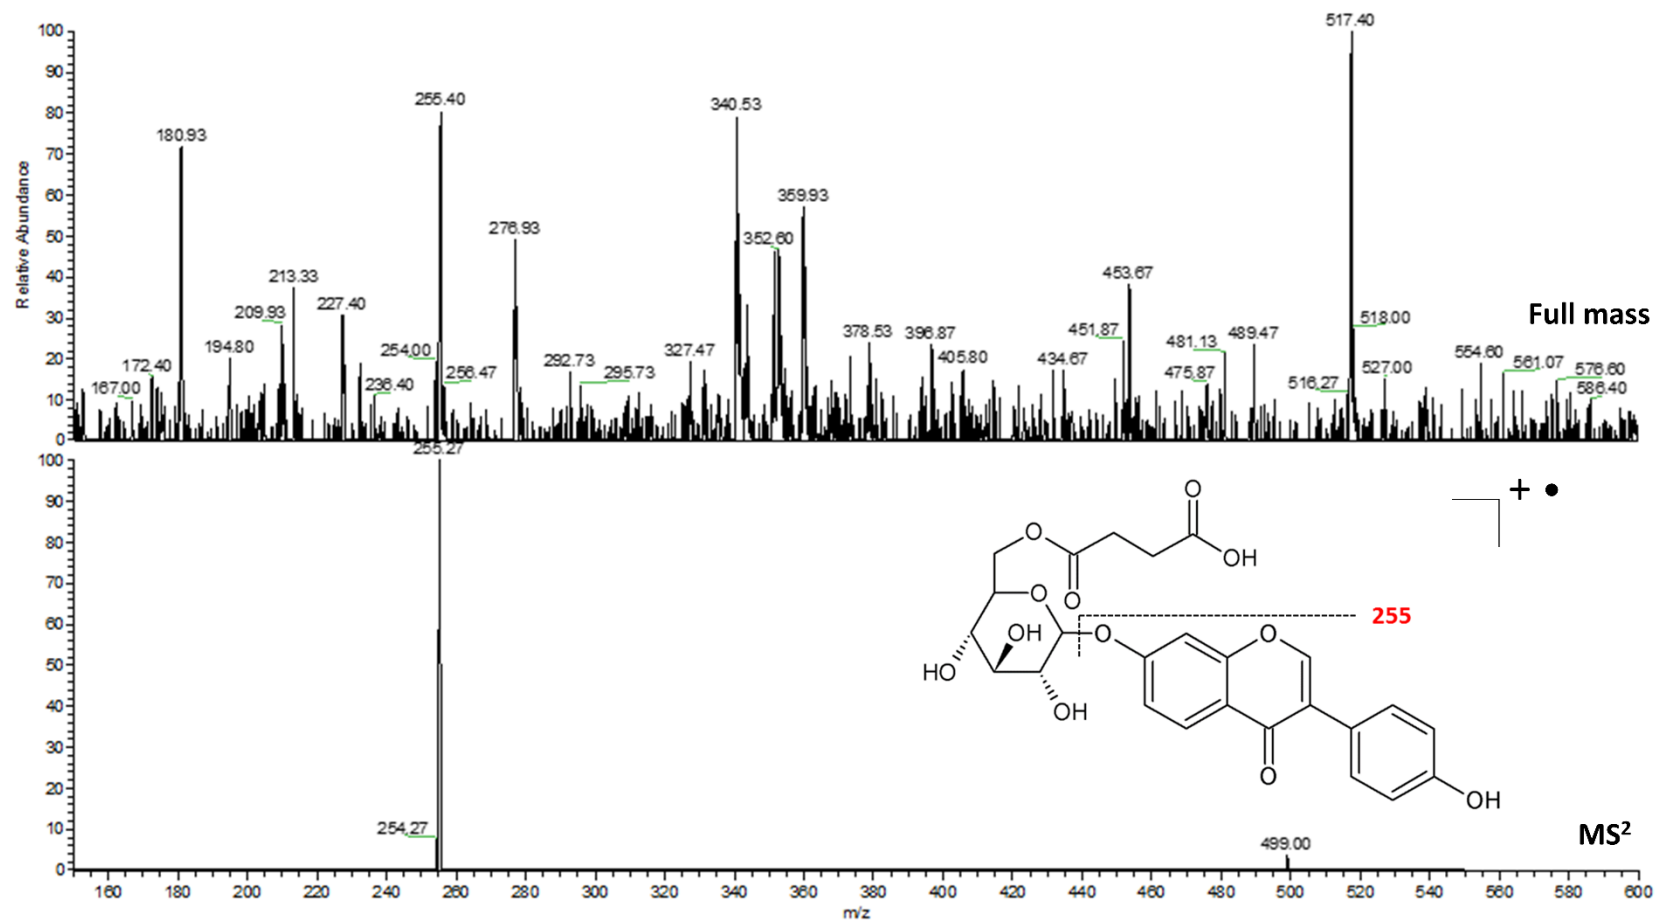

Figure S2.

6''-O-succinyl genistin (GEN-GS)

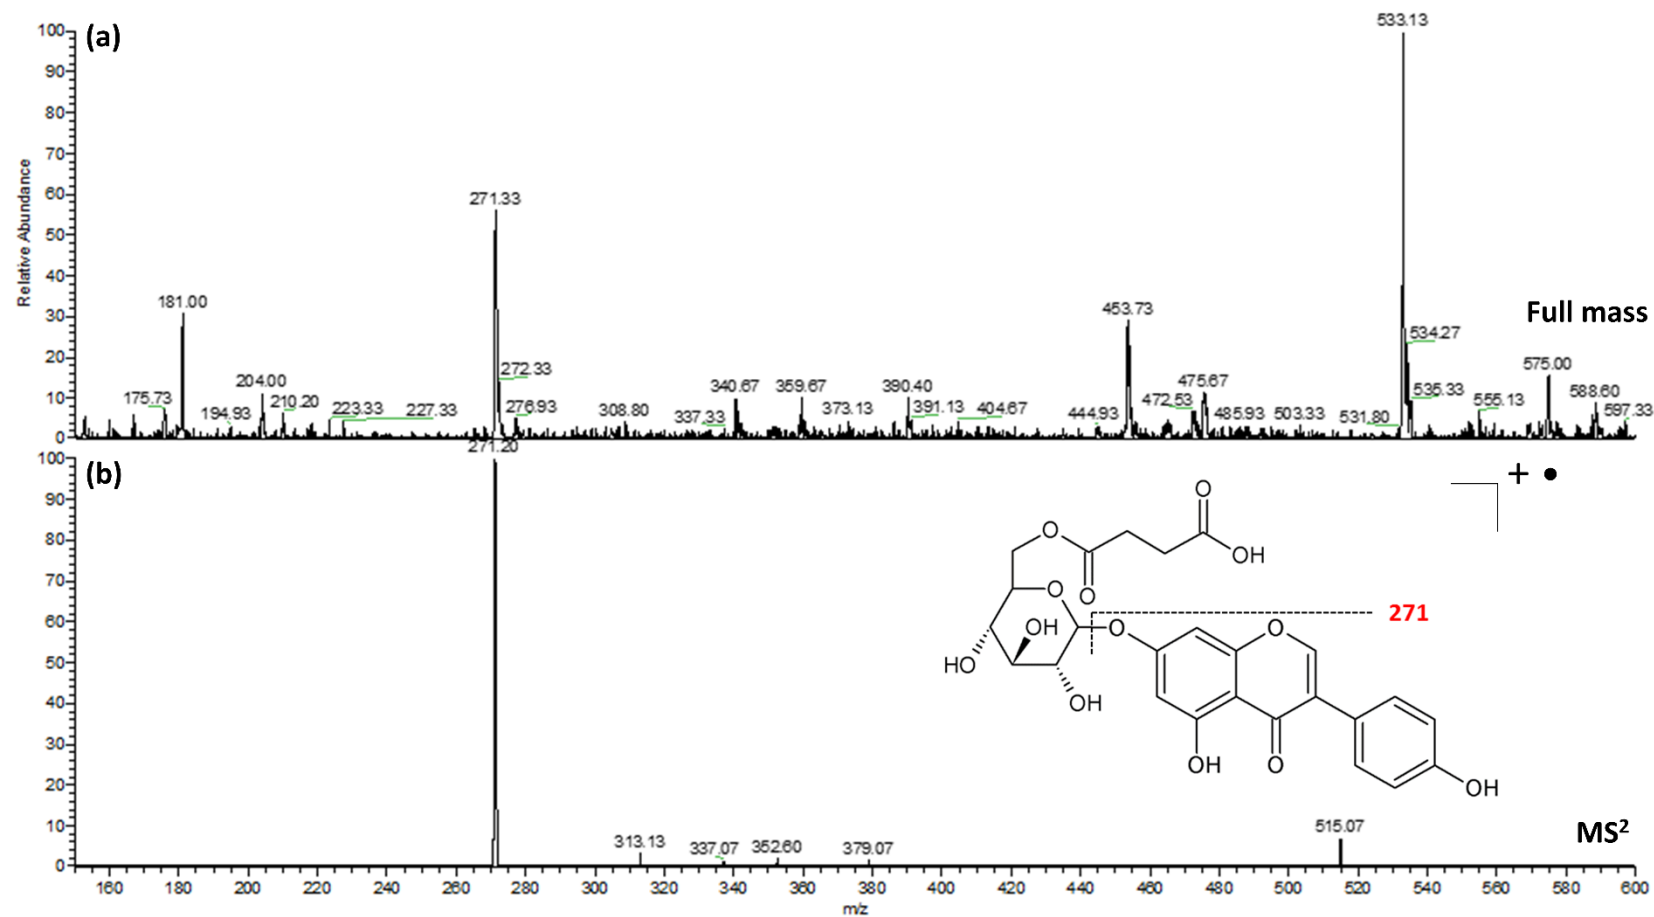

Figure S3.

(a)

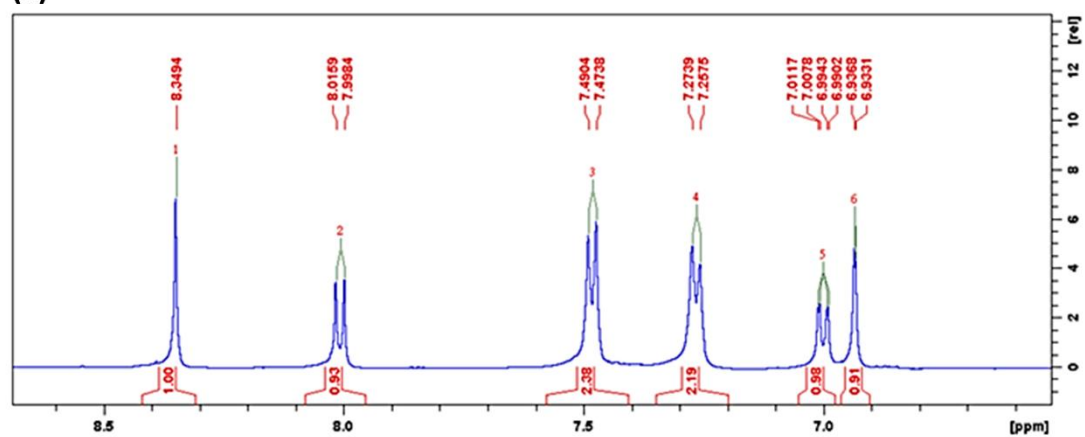

(b)

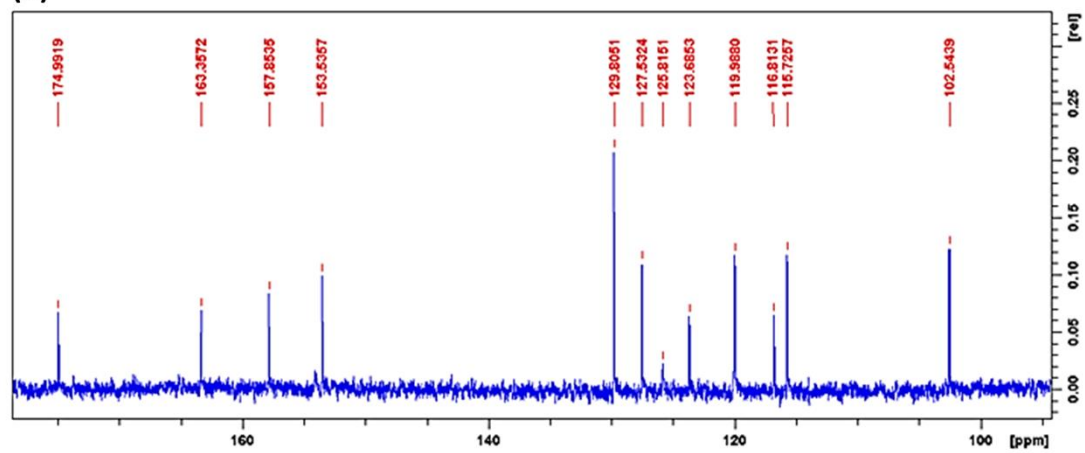

Figure S4.

(a)

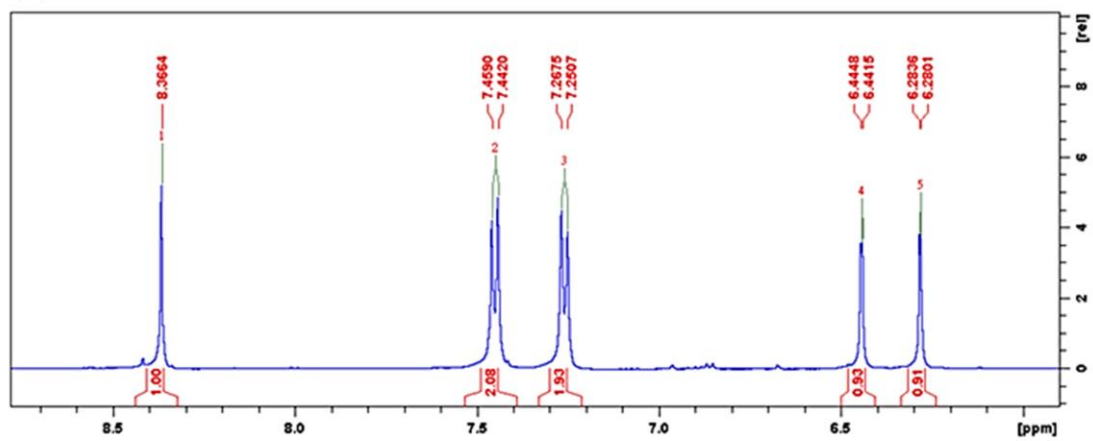

(b)

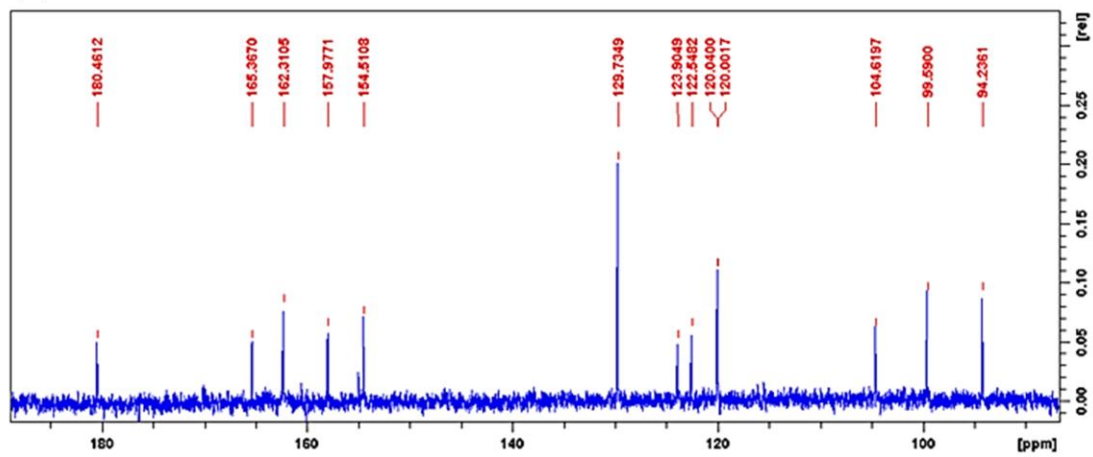

Supplement: Supplementary file 1 [file 10071562]
